# Supplementary material for: Determinants for Sustained Use of an Activity Tracker: Observational Study
Source: PubMed Central journal article supplement (PMC5695980; doi:10.2196/mhealth.7311), 2017-10-30
Supplement: mhealth_v5i10e164_app1.pdf [file mhealth_v5i10e164_app1.pdf]

## **Multimedia Appendix 1:**

### **All questionnaire items with response scales, variables in which they were used, transformations, and validity evaluation**

#### **Questionnaire 1**

##### **Q1.01 City**

Question: City

Response Scale

*Bordeaux, Montpellier, Lille, Lyons*

Used in Variable: city\_1

Transformations: Transformed to numerical scale (nominal): 1 Bordeaux, 2 Montpellier, 3 Lille, 4 Lyons

Remarks:

Research has shown that single-item measures are valid when the attribute (in this case, city name) is concrete and singular and the object (in this case, place of residence) is concrete (Bergqvist & Rossiter, 2007). Thus, we can probably conclude that that these single-item self-report measures are a sufficiently valid measure for the purpose of this paper.

##### **Q1.02 Gender**

Question: Are you...? Please select one of the following: (select one)

Response Scale

*Male, Female*

Used in Variable: sex\_1

Transformations: Transformed to numerical scale (nominal): 1 Female, 2 Male

Remarks:

Single-item measurement of concrete, singular object

##### **Q1.03 Age**

Question: What is your age group? (select one)

Response Scale

*< 25, 25–35, 36–45, 46–55, 56–65, 65 >*

Used in Variable: age\_1

Transformations: Transformed to numerical scale (ordinal): 1 <25, 2 25-35, 3 36-45, 4 46-55, 5 56-65, 6 65+

Remarks:

Single-item measurement of concrete, singular object

#### **Q1.04 Household size**

Question: How many people live in your household?

Response Scale:

*numerical*

Used in Variable: household\_size\_1

Transformations: none

Remarks:

Single-item measurement of concrete, singular object

#### **Q1.05 Household Structure**

Question: What is your household structure? (select one)

Response Scale:

*Single person, couple w/o children, single parent, couple with children, other*

Used in Variable: household\_type\_1

Transformations: Transformed to numerical scale (nominal): 1 Single person, 2 couple w/o children, 3 single parent, 4, couple with children, 5 other

Remarks:

Single-item measurement of concrete, singular object

#### **Q1.06 Occupation**

Question: What is the head of the household's occupation? (select one)

Response Scale:

*Cadre (Executive, Senior Knowledge Worker), Intermédiaire (Middle Management, ), Employé (Administrative, Sales, or Service Occupations) Artisan (Farmer, craftsperson), Ouvrier (Factory worker, manual worker), Retraité (Pensioner), Sans (Unemployed)*

Used in Variable: profession\_1

Transformations: Transformed to numerical scale (nominal): 1 Cadre, 2 Intermédiaire, 3 Employé, 4 Artisan, 5 Ouvrier, 6 Retraité, 7 Sans

Remarks:

Single-item measurement of concrete, singular object.

The classification used in this question follows that of the French Census (cf. Niedhammer, Chastang, David, & Kelleher, 2008).

#### **Q1.07 Owned Digital Devices**

Question: Please select from the following list all the devices that you own and use on a daily basis. (select all appropriate)

Response Scale:

*Personal computer Broadband Internet connection (ADSL, Box, optical fibre, etc.) iPhone, Android smartphone*

Used in Variable: computer\_1, broadband\_1, smartphone\_1, ios\_1, android\_1, tablet\_1  
Transformations: Every checkbox is transformed in a digital variable: 0 does not own/use, 1 own/use

Remarks:  
Single-item measurement of concrete, singular object

#### **Q1.07a iPhone Type**

Question: Which iPhone model do you own? (depending on answer Q7)  
Response Scale:  
*iPhone 4S, iPhone 5, other*

Used in Variable: iphone\_type\_1  
Transformations: Transformed to numerical scale (nominal): 1 Other, 2 iPhone 4S, 3 iPhone 5

Remarks:  
Single-item measurement of concrete, singular object

#### **Q1.07b Android Type**

Question: Which Android smartphone model do you own? (depending on answer Q7)  
Response Scale:  
*Open*

Used in Variable: samsung\_type\_1  
Transformations: Transformed to numerical scale (nominal): 1 Other 2 Samsung Galaxy SIII

Remarks:  
Single-item measurement of concrete, singular object

#### **Q1.07c Tablet Type**

Question: What model of tablet do you own? (depending on answer Q7)  
Response scale:  
*open*

Used in Variable: tablet\_1  
Transformations:

Remarks:  
Single-item measurement of concrete, singular object

#### **Q1.07d QS/Fitness apps**

Question: What applications have you downloaded to your smartphone or tablet?  
Please select all that apply (more answers possible)  
Response scale: Select from:

*Fitbit, Lose It!, My Fitnesspal, Mapmyrun, Endomondo, RunKeeper, MyKilos, DriveBit, iCardio, iRunner, Miracle, Other (field)*

Used in Variable: apps\_1

Transformations: apps\_1 counts the total number of apps installed

Remarks:

Single-item measurement of concrete, singular object.

### **Q1.08 Education**

Question: What is the highest degree or level of education that you have completed?

Response Scale:

*Bac, Bac+2 or Bac+3, Bac+5 and further, CAP or BEP, Brevet des collèges, None (primary school only)*

Used in Variable: education\_1

Transformations: Transformed to numerical scale (nominal): 1 Bac, 2 Bac +2 of Bac+3, 3 Bac+5 and sup., 4 Cap or BEP, 5 Brevet des Collèges, 6 None

Remarks:

Single-item measurement of concrete, singular object

This classification follows that of the French Ministry of Education (MESRI, 2017).

### **Q1.09 Height**

Question: How tall are you (in cm)?

Response Scale:

*Numerical, in cm*

Used in Variable: bmi\_1 (see below)

Transformations: Height was divided by 100 to obtain height in meters. Then bmi\_1 was calculated by dividing weight in kilograms by height in meters squared

Remarks: We use self-reported weight in combination with self-reported height to determine BMI, which is used in the analysis. A study among English middle-aged men and women (Spencer, Appleby, Davey, & Key, 2002) showed that self-reported BMI correlated highly with measured BMI (Spearman  $r > .9$ ). Thus, we can probably conclude that self-reported BMI is a sufficiently valid measure for our purposes.

### **Q1.10 Weight**

Question: How much do you weigh (in kg)? (If the last time you weighed yourself was a week ago, please weigh yourself again)

Response scale:

*Numerical (in kilos)*

Used in Variable: bmi\_1

Transformations: bmi\_1 was calculated by dividing weight in kilograms by height in meters squared

Remarks: See above under Q1.09

### **Q1.11 Smoking**

Question: Do you smoke or have you smoked in the past three months?

Response Scale:

*dichotomous (yes, no)*

Used in Variable: smoker\_1

Transformations: Transformed to numerical scale (nominal): 1 no, 2 yes

Remarks:

Single-item measurement of concrete, singular object

Smoking is a behaviour that is generally seen as undesired, and therefore susceptible to underreporting. Indeed, some reviews (i.e. Gorber et al., 2009) find that self-report of smoking is susceptible to bias, whereas other reviews (i.e. Patrick et al., 1994) show that self-reported smoking correlates highly with biochemical smoking measures. However, since bias is thought to lead to underreporting the number of cigarettes smoked per day towards the nearest round number (Klesges, Debon, & Ray, 1995) and not the denial of smoking per se, we can probably conclude that self-reported smoking is a sufficiently valid measure for our purposes.

### **Q1.12 Pregnancy**

Question: Are you currently pregnant?

Response Scale:

*dichotomous (yes, no)*

Used in Variable: pregnant\_1

Transformations: Transformed to numerical scale (nominal): 1 no, 2 yes

Remarks:

Single-item measurement of concrete, singular object

### **Q1.13 Diet**

Question: Are you currently on a diet?

Response Scale

*dichotomous (yes, no)*

Used in Variable: diet\_1

Transformations: Transformed to numerical scale (nominal): 1 no, 2 yes

Remarks:

Single-item measurement of concrete, singular object

Dietary intake is generally known as susceptible to underreporting (Subar et al., 2015). However, this generally concerns energy intake, and not the fact that a participant is currently following a diet. A single item measure of partaking in a diet is customary used in health-related studies (e.g. Geurden et al., 2014; Kelly et al., 2016; Li et al., 2016; and others). We therefore conclude that self-reported diet is a sufficiently valid measure for our purposes.

### **Q1.14 GP visits**

Question: In the past month, how many times did you see your general practitioner?

Response Scale

*Open*

Used in Variable: visits\_1

Transformations: None

Remarks:

A study among 303 primary care attenders in the UK (Patel et al., 2005) showed that there is good agreement between GP records and self-reported GP attendance. Thus, we can probably conclude that a self-report measure of GP visits is a sufficiently valid measure for our purposes.

### **Q1.15 Sports**

Question: When it comes to playing sports, what statement is most applicable?

Response Scale

*You play a sport occasionally (less than once a week)*

*You play a sport regularly (at least once a week)*

*You play a sport intensively (at least twice a per week)*

*You play a sport at a high level or professionally*

Used in Variable: sport\_level\_1

Transformations: Transformed to numerical scale (nominal): 1 Occasionally, 2 Regularly, 3 Intensively, 4 High level

Remarks:

Single-item measurement of concrete, singular object

A review of existing literature (Sallis & Saelens, 2000) suggests that self-report of vigorous physical activity (e.g. participating in sports activities) are relatively valid when compared to self-report measures of physical activity in general. Thus, we can probably conclude that a self-report measure of sports activity is a sufficiently valid measure for the purpose of this paper.

### **Q1.16 Sports in Company**

Question: When you were doing sports, were you mostly...

Response Scale:

*alone, with a family member with a friend, with a colleague, in a team*

Used in Variable: sport\_company\_1

Transformations: Transformed to numerical scale (nominal): 1 alone, 2 with a family member, 3 with a friend, 4 with a colleague, 5 in a team

Remarks:

Single-item measurement of concrete, singular object

See above under Q1.15 Sports

### **Q1.17 Sleep quality**

Question: How would you rate the quality of your sleep right now?

Response Scale:

*1 – 10 (1 very poor t/m 10 excellent)*

Used in Variable: sleep\_quality\_1

Transformations: None

Remarks:

The gold standard of sleep quality assessment is the Pittsburgh Sleep Quality Index (PSQI, Buysse et al., 1989). The single-item measurement in the questionnaire does not offer the same validity as the PSQI, which consists of a range of items assessed in a longer period of time. However, single-item measurements of sleep quality have also been found useful and valid (e.g. Jenkins et al., 1988; Cappelleri et al., 2009). Thus, we can probably conclude that a single item self-report measure of sleep quality is a sufficiently valid measure for the purpose of this paper.

### **Q1.18 Emotional well-being**

Question: How would you rate your emotional well-being right now?

Response Scale

*1 – 10 (1 very poor t/m 10 excellent)*

Used in Variable: mood\_1

Transformations: None

Remarks:

This range of questions (Q1.18 – Q1.24) all assess emotional wellbeing. Single-item assessments of emotional wellbeing are often used in large scale surveys (see Cooke, Melchert, & Connor, 2016 for an overview) and have been shown to perform quite well compared to multiple-items scales (e.g., Jovanović, 2016). We can therefore probably conclude that these single-item self-report measures are a sufficiently valid measure for the purpose of this paper.

### **Q1.19 Fatigue**

Question: Last month, did you feel tired during the day?

Response Scale:

*strongly disagree, somewhat disagree, somewhat agree, strongly agree*

Used in Variable: tired\_1

Transformations: Transformed to numerical scale (ordinal): 1 Strongly Disagree 2 Somewhat Disagree

3 Somewhat Agree 4 Strongly Agree

Remarks:

See above, under Q1.18

### **Q1.20 General health**

Question: Last month, did you feel healthy?

Response Scale:

*strongly disagree, somewhat disagree, somewhat agree, strongly agree*

Used in Variable: well\_1

Transformations: Transformed to numerical scale (ordinal): 1 Strongly Disagree 2 Somewhat Disagree  
3 Somewhat Agree 4 Strongly Agree

Remarks:

See above, under Q1.18

### **Q1.21 Sadness**

Question: Last month, did you feel sad?

Response Scale:

*strongly disagree, somewhat disagree, somewhat agree, strongly agree*

Used in Variable: affect\_1

Transformations: Transformed to numerical scale (ordinal): 1 Strongly Disagree 2 Somewhat Disagree  
3 Somewhat Agree 4 Strongly Agree

Variable affect\_1 was calculated by subtracting Sadness score from happiness score (see below)

Variable affect\_123, a measure of emotional wellbeing derived from items about happiness and sadness in all three questionnaires (Q1.21, Q1.22, Q2.01, Q2.02, Q3.01 and Q3.02) was calculated by subtracting the sum of all three sadness items (Q1.21 + Q2.02 + Q3.02) divided by three from the sum of all three happiness items (Q1.22 + Q2.01 + Q3.01) divided by three.

Remarks:

See above, under Q1.18

### **Q1.22 Happiness**

Question: Last month, did you feel happy?

Response Scale:

*strongly disagree, somewhat disagree, somewhat agree, strongly agree*

Used in Variable: affect\_1

Transformations: Transformed to numerical scale (ordinal): 1 Strongly Disagree 2 Somewhat Disagree  
3 Somewhat Agree 4 Strongly Agree

Variable affect\_1 was calculated by subtracting Sadness score from happiness score (see above)

Variable affect\_123, a measure of emotional wellbeing derived from items about happiness and sadness in all three questionnaires (Q1.21, Q1.22, Q2.01, Q2.02, Q3.01 and Q3.02) was calculated by subtracting the sum of all three sadness items (Q1.21 + Q2.02 + Q3.02) divided by three from the sum of all three happiness items (Q1.22 + Q2.01 + Q3.01) divided by three.

Remarks:

See above, under Q1.18

### **Q1.23 Stress**



Question: Last month, did you feel stressed?

Response Scale:

*strongly disagree, somewhat disagree, somewhat agree, strongly agree*

Used in Variable: stress\_1

Transformations: Transformed to numerical scale (ordinal): 1 Strongly Disagree 2 Somewhat Disagree 3 Somewhat Agree 4 Strongly Agree

Variable Stressed\_1 was calculated by subtracting the result of item Q1.24 (Calmness) from the result of item Q1.23 (Stress).

Remarks:

See above, under Q1.18

### **Q1.24 Calmness**

Question: Last month, did you feel calm?

Response Scale:

*strongly disagree, somewhat disagree, somewhat agree, strongly agree*

Used in Variable: calm\_1

Transformations: Transformed to numerical scale (ordinal): 1 Strongly Disagree 2 Somewhat Disagree 3 Somewhat Agree 4 Strongly Agree

Variable Stressed\_1 was calculated by subtracting the result of item Q1.24 (Calmness) from the result of item Q1.23 (Stress).

Remarks:

See above, under Q1.18

### **Q1.25 Goal: increasing activity**

Question: Do you have the goal to increase your activity?

Response Scale:

*strongly disagree, somewhat disagree, somewhat agree, strongly agree*

Used in Variable: goal\_active\_1

Transformations: Transformed to numerical scale (ordinal): 1 Strongly Disagree 2 Somewhat Disagree 3 Somewhat Agree 4 Strongly Agree

Remarks:

Fitness goals (Q1.25-Q1.33) were assessed using 9 items, each assessing a different goal: respondents were asked to indicate on a 4-pt Likert scale (1= strongly disagree, 4 =strongly agree) whether they had the goal to improve sleep / quit smoking / observe nutrition / change nutrition / increase the motivation for physical activity / observe health / increase activity / lose weight. Each item was used as a single item measure of the specific goal that was assessed. Research has shown that single-item measures are valid when the attribute (in this case, agreement) is concrete and singular and the object (in this case, a fitness goal) is concrete (Bergqvist & Rossiter, 2007). Thus, we can probably conclude that that these single-item self-report measures are a sufficiently valid measure for the purpose of this paper.

### **Q1.26 Goal: improving sleep**

Question: Do you have the goal to improve your sleep?

Response Scale:

*strongly disagree, somewhat disagree, somewhat agree, strongly agree*

Used in Variable: goal\_sleep\_1

Transformations: Transformed to numerical scale (ordinal): 1 Strongly Disagree 2 Somewhat Disagree  
3 Somewhat Agree 4 Strongly Agree

Remarks:

See above, under Q1.25

### **Q1.27 Goal: quit smoking**

Question: Do you have the goal to quit smoking?

Response Scale:

*strongly disagree, somewhat disagree, somewhat agree, strongly agree*

Used in Variable: goal\_smoking\_1

Transformations: Transformed to numerical scale (ordinal): 1 Strongly Disagree 2 Somewhat Disagree  
3 Somewhat Agree 4 Strongly Agree

Remarks:

See above, under Q1.25

### **Q1.28 Goal: observing nutrition**

Question: Do you have the goal to observe your nutrition?

Response Scale:

*strongly disagree, somewhat disagree, somewhat agree, strongly agree*

Used in Variable: goal\_food\_watch\_1

Transformations: Transformed to numerical scale (ordinal): 1 Strongly Disagree 2 Somewhat Disagree  
3 Somewhat Agree 4 Strongly Agree

Remarks:

See above, under Q1.25

### **Q1.29 Goal: changing nutrition**

Question: Do you have the goal to change your nutrition?

Response Scale:

*strongly disagree, somewhat disagree, somewhat agree, strongly agree*

Used in Variable: goal\_eating\_habits\_1

Transformations: Transformed to numerical scale (ordinal): 1 Strongly Disagree 2 Somewhat Disagree  
3 Somewhat Agree 4 Strongly Agree

Remarks:

See above, under Q1.25

### **Q1.30 Goal: increasing motivation for physical activity**

Question: Do you have the goal to increase your motivation for physical activity?

Response Scale:

*strongly disagree, somewhat disagree, somewhat agree, strongly agree*

Used in Variable: goal\_motivation\_1

Transformations: Transformed to numerical scale (ordinal): 1 Strongly Disagree 2 Somewhat Disagree  
3 Somewhat Agree 4 Strongly Agree

Remarks:

See above, under Q1.25

### **Q1.31 Goal: observing health**

Question: Do you have the goal to observe your health?

Response Scale:

*strongly disagree, somewhat disagree, somewhat agree, strongly agree*

Used in Variable: goal\_health\_1

Transformations: Transformed to numerical scale (ordinal): 1 Strongly Disagree 2 Somewhat Disagree  
3 Somewhat Agree 4 Strongly Agree

Remarks:

See above, under Q1.25

### **Q1.32 Goal: weight loss**

Question: Do you have the goal to lose weight?

Response Scale:

*strongly disagree, somewhat disagree, somewhat agree, strongly agree*

Used in Variable: goal\_weight\_1

Transformations: Transformed to numerical scale (ordinal): 1 Strongly Disagree 2 Somewhat Disagree  
3 Somewhat Agree 4 Strongly Agree

Remarks:

See above, under Q1.25

### **Q1.33 Goal: improving physical condition**

Question: Do you have the goal to improve your physical condition?

Response Scale:

*strongly disagree, somewhat disagree, somewhat agree, strongly agree*

Used in Variable: goal\_shape\_1

Transformations: Transformed to numerical scale (ordinal): 1 Strongly Disagree 2 Somewhat Disagree  
3 Somewhat Agree 4 Strongly Agree

Remarks:

See above, under Q1.25

Not Used:

### **QN1.01 Medication**

Question: In the past month, have you had to take medication every day?

Response Scale:

*Yes, No*

Remarks:

The wording of the question leads to confusion. What constitutes medication? What about medication which does not have to be taken every day, but still leads to changes in physical activity?

### QN1.02 General activity

Question: Are you an active person?

Response Scale:

*Yes, No*

Remarks:

The dichotomous response scale does not leave room for the nuance many people would like to add to their answer. Furthermore, social desirability makes it unlikely that people entering a study using activity trackers would answer this question with a plain 'no'.

## Questionnaire 2

### Q2.01 Happiness

Question: Last month, did you feel happy?

Response Scale:

*strongly disagree, somewhat disagree, somewhat agree, strongly agree*

Used in Variable: affect\_2

Transformations: Transformed to numerical scale (ordinal): 1 Strongly Disagree 2 Somewhat Disagree 3 Somewhat Agree 4 Strongly Agree

Variable affect\_123, a measure of emotional wellbeing derived from items about happiness and sadness in all three questionnaires (Q1.21, Q1.22, Q2.01, Q2.02, Q3.01 and Q3.02) was calculated by subtracting the sum of all three sadness items (Q1.21 + Q2.02 + Q3.02) divided by three from the sum of all three happiness items (Q1.22 + Q2.01 + Q3.01) divided by three.

Remarks:

This question and the following (Q2.01 – Q2.04) all assess emotional wellbeing. Single-item assessments of emotional wellbeing are often used in large scale surveys (see Cooke, Melchert, & Connor, 2016 for an overview) and have been shown to perform quite well compared to multiple-items scales (e.g., Jovanović, 2016). We can therefore probably conclude that these single-item self-report measures are a sufficiently valid measure for the purpose of this paper.

### Q2.02 Sadness

Question: Last month, did you feel sad?

Response Scale:

*strongly disagree, somewhat disagree, somewhat agree, strongly agree*

Used in Variable: affect\_2

Transformations: Transformed to numerical scale (ordinal): 1 Strongly Disagree 2 Somewhat Disagree 3 Somewhat Agree 4 Strongly Agree

Variable affect\_123, a measure of emotional wellbeing derived from items about happiness and sadness in all three questionnaires (Q1.21, Q1.22, Q2.01, Q2.02, Q3.01 and Q3.02) was calculated by subtracting the sum of all three sadness items (Q1.21 + Q2.02 + Q3.02) divided by three from the sum of all three happiness items (Q1.22 + Q2.01 + Q3.01) divided by three.

Remarks:

See above, under Q2.01

### Q2.03 Stress

Question: Last month, did you feel stressed?

Response Scale:

*strongly disagree, somewhat disagree, somewhat agree, strongly agree*

Used in Variable: stress\_2

Transformations: Transformed to numerical scale (ordinal): 1 Strongly Disagree 2 Somewhat Disagree 3 Somewhat Agree 4 Strongly Agree

Variable Stressed\_123 was calculated by subtracting the sum of items Q1.24, Q2.04 and Q3.04 (Calmness) divided by 3 from the sum of items Q1.23, Q2.03 and Q3.03 (Stress) divided by 3.

Remarks:

See above, under Q2.01

#### **Q2.04 Calmness**

Question: Last month, did you feel calm?

Response Scale:

*strongly disagree, somewhat disagree, somewhat agree, strongly agree*

Used in Variable: calm\_2

Transformations: Transformed to numerical scale (ordinal): 1 Strongly Disagree 2 Somewhat Disagree 3 Somewhat Agree 4 Strongly Agree

Variable Stressed\_123 was calculated by subtracting the sum of items Q1.24, Q2.04 and Q3.04 (Calmness) divided by 3 from the sum of items Q1.23, Q2.03 and Q3.03 (Stress) divided by 3.

Remarks:

See above, under Q2.01

#### **Q2.05 Online Social Sharing**

Question: Did you share your scores on... Select all that apply

Response Scale:

*Your social media profile, Your website Twitter, A blog, A forum, A messaging service*

Used in Variable: share\_online\_23

Transformations: if participant selected one or more of these items OR if participant selected one or more of these items in questionnaire 3 (Q3.05), share\_online\_23 was set to 1; otherwise, share\_online\_23 was set to 0.

Remarks:

Single-item measurement of concrete, singular object

#### **Q2.06 Offline Social Sharing**

Question: Whom did you tell about the My Santé Mobile programme? Select all that apply

Response Scale:

*A family member, A friend, A colleague, Members of a group (club, association, etc.)*

Used in variables: talked\_relative\_2 talked\_friends\_2 talked\_colleagues\_2 talked\_club\_2

Transformations: if participant selected 'a family member' here or in Q3 (Q3.07), talked\_relative\_23 was set to 1, otherwise 0

if participant selected 'a family member' here or in Q3 (Q3.07), talked\_friends\_23 was set to 1, otherwise 0

if participant selected 'a friend' here or in Q3 (Q3.07), talked\_club\_23 was set to 1, otherwise 0

if participant selected 'a colleague' here or in Q3 (Q3.07), talked\_colleagues\_23 was set to 1, otherwise 0

if participant selected 'members of a group' here or in Q3 (Q3.07), talked\_club\_23 was set to 1, otherwise 0

Remarks:

Single-item measurement of concrete, singular object

### **Q2.07 Useful**

Question: What do you think of the Fitbit? For each of the following statements, indicate if you strongly agree, somewhat agree, somewhat disagree, or strongly disagree. You think the Fitbit is USEFUL

Response Scale:

*strongly disagree, somewhat disagree, somewhat agree, strongly agree*

Used in variable: feat\_practical\_2

Transformations: Transformed to numerical scale (ordinal): 1 Strongly Disagree 2 Somewhat Disagree 3 Somewhat Agree 4 Strongly Agree

Scores on items Q2.07 – Q2.18 from Questionnaire 2, and items Q3.23 – Q3.40 from Questionnaire 3 were used in a factor analysis, which informed the construction of three scales:

1) Valence (UX\_valence), formed by the sum of the items usefulness / practicality (Q2.07), enjoyableness (Q2.08), modernity (Q2.10), fun (Q2.11), credibility (Q3.34), ease of use (Q2.13), level of answering to needs (Q2.15), beauty (Q2.18), and robustness (Q2.19), divided by 9, minus the sum of the items intrusiveness (Q2.09), inconvenience (Q2.14, and cumbersomeness / nuisance (Q2.16), divided by 3.

2) Preciseness (UX\_precise), formed by the sum of the items exactness (Q3.31), level of detail (Q3.32), clarity (Q3.33), and reliability (Q2.12), divided by 4, and

3) perceived efficacy (UX\_effect), formed by the sum of the items perceived effect on activity increase (Q3.37), perceived effect on health changes (Q3.38), and wellbeing (Q3.39), divided by three.

The results of the factor analysis (PCA) can be found in table 1 (items Q2.07 – Q2.18) and 2 (items Q3.23 – Q3.40) at the end of this multimedia appendix.

Remarks

The three UX-related factors Valence, Preciseness, and Perceived Efficacy match similar factors in user experience research (e.g. Hassenzahl, 2003). Therefore we may conclude that the results of the factor analysis are valid enough for the purpose of this study.

The results of the factor analysis (PCA) can be found in table 1 (items Q2.07 – Q2.18) and 2 (items Q3.23 – Q3.40) at the end of this multimedia appendix.

### **Q2.08 Enjoyable**

Question: What do you think of the Fitbit? For each of the following statements, indicate if you strongly agree, somewhat agree, somewhat disagree, or strongly disagree. You think the Fitbit is ENJOYABLE

Response Scale:

*strongly disagree, somewhat disagree, somewhat agree, strongly agree*

Used in variable: feat\_nice\_2

Transformations: Transformed to numerical scale (ordinal): 1 Strongly Disagree 2 Somewhat Disagree 3 Somewhat Agree 4 Strongly Agree

Remarks

See above under Q2.07

### **Q2.09 Intrusive**

Question: What do you think of the Fitbit? For each of the following statements, indicate if you strongly agree, somewhat agree, somewhat disagree, or strongly disagree. You think the Fitbit is INTRUSIVE

Response Scale:

*strongly disagree, somewhat disagree, somewhat agree, strongly agree*

Used in variable: feat\_intrusive\_2

Transformations: Transformed to numerical scale (ordinal): 1 Strongly Disagree 2 Somewhat Disagree 3 Somewhat Agree 4 Strongly Agree

Remarks

See above under Q2.07

### **Q2.10 Modern**

Question: What do you think of the Fitbit? For each of the following statements, indicate if you strongly agree, somewhat agree, somewhat disagree, or strongly disagree. You think the Fitbit is MODERN

Response Scale:

*strongly disagree, somewhat disagree, somewhat agree, strongly agree*

Used in variable: feat\_modern\_2

Transformations: Transformed to numerical scale (ordinal): 1 Strongly Disagree 2 Somewhat Disagree 3 Somewhat Agree 4 Strongly Agree

Remarks

See above under Q2.07

### **Q2.11 Fun**

Question: What do you think of the Fitbit? For each of the following statements, indicate if you strongly agree, somewhat agree, somewhat disagree, or strongly disagree. You think the Fitbit is FUN

Response Scale:

*strongly disagree, somewhat disagree, somewhat agree, strongly agree*

Used in variable: feat\_amusing\_2

Transformations: Transformed to numerical scale (ordinal): 1 Strongly Disagree 2 Somewhat Disagree 3 Somewhat Agree 4 Strongly Agree

Remarks

See above under Q2.07



### **Q2.12 Reliable**

Question: What do you think of the Fitbit? For each of the following statements, indicate if you strongly agree, somewhat agree, somewhat disagree, or strongly disagree. You think the Fitbit is RELIABLE

Response Scale:

*strongly disagree, somewhat disagree, somewhat agree, strongly agree*

Used in variable: feat\_credible\_2

Transformations: Transformed to numerical scale (ordinal): 1 Strongly Disagree 2 Somewhat Disagree 3 Somewhat Agree 4 Strongly Agree

Remarks

See above under Q2.07

### **Q 2.13 Simple to use**

Question: What do you think of the Fitbit? For each of the following statements, indicate if you strongly agree, somewhat agree, somewhat disagree, or strongly disagree. You think the Fitbit is SIMPLE TO USE

Response Scale:

*strongly disagree, somewhat disagree, somewhat agree, strongly agree*

Used in variable: feat\_easy\_2

Transformations: Transformed to numerical scale (ordinal): 1 Strongly Disagree 2 Somewhat Disagree 3 Somewhat Agree 4 Strongly Agree

See above under Q2.07

Remarks

See above under Q2.07

### **Q2.14 Inconvenient**

Question: What do you think of the Fitbit? For each of the following statements, indicate if you strongly agree, somewhat agree, somewhat disagree, or strongly disagree. You think the Fitbit is INCONVENIENT

Response Scale:

*strongly disagree, somewhat disagree, somewhat agree, strongly agree*

Used in variable: feat\_embarrassing\_2

Transformations: Transformed to numerical scale (ordinal): 1 Strongly Disagree 2 Somewhat Disagree 3 Somewhat Agree 4 Strongly Agree

Remarks

See above under Q2.07

### **Q2.15 Meets your needs**

Question: What do you think of the Fitbit? For each of the following statements, indicate if you strongly agree, somewhat agree, somewhat disagree, or strongly disagree. You think the Fitbit is MEETING YOUR NEEDS

Response Scale:

*strongly disagree, somewhat disagree, somewhat agree, strongly agree*

Used in variable: feat\_needs\_2

Transformations: Transformed to numerical scale (ordinal): 1 Strongly Disagree 2 Somewhat Disagree 3 Somewhat Agree 4 Strongly Agree

Remarks

See above under Q2.07

### **Q2.16 Cumbersome**

]Question: What do you think of the Fitbit? For each of the following statements, indicate if you strongly agree, somewhat agree, somewhat disagree, or strongly disagree. You think the Fitbit is CUMBERSOME

Response Scale:

*strongly disagree, somewhat disagree, somewhat agree, strongly agree*

Used in variable: feat\_nuisance\_2

Transformations: Transformed to numerical scale (ordinal): 1 Strongly Disagree 2 Somewhat Disagree 3 Somewhat Agree 4 Strongly Agree

Remarks

See above under Q2.07

### **Q2.17 Beautifully designed**

Question: What do you think of the Fitbit? For each of the following statements, indicate if you strongly agree, somewhat agree, somewhat disagree, or strongly disagree. You think the Fitbit is BEAUTIFULLY DESIGNED

Response Scale:

*strongly disagree, somewhat disagree, somewhat agree, strongly agree*

Used in variable: feat\_beautiful\_2

Transformations: Transformed to numerical scale (ordinal): 1 Strongly Disagree 2 Somewhat Disagree 3 Somewhat Agree 4 Strongly Agree

Remarks

See above under Q2.07

### **Q2.18 Robustness / Sturdiness**

Question: What do you think of the Fitbit? For each of the following statements, indicate if you strongly agree, somewhat agree, somewhat disagree, or strongly disagree. You think the Fitbit is STURDY

Response Scale:

*strongly disagree, somewhat disagree, somewhat agree, strongly agree*

Used in variable: feat\_robust\_2

Transformations: Transformed to numerical scale (ordinal): 1 Strongly Disagree 2 Somewhat Disagree  
3 Somewhat Agree 4 Strongly Agree

Remarks

See above under Q2.07

### Questionnaire 3

#### Q3.01 Happiness

Question: Last month, did you feel happy?

Response Scale:

*strongly disagree, somewhat disagree, somewhat agree, strongly agree*

Used in Variable: happy\_3

Transformations: Transformed to numerical scale (ordinal): 1 Strongly Disagree 2 Somewhat Disagree 3 Somewhat Agree 4 Strongly Agree

Variable affect\_123, a measure of emotional wellbeing derived from items about happiness and sadness in all three questionnaires (Q1.21, Q1.22, Q2.01, Q2.02, Q3.01 and Q3.02) was calculated by subtracting the sum of all three sadness items (Q1.22 + Q2.02 + Q3.02) divided by three from the sum of all three happiness items (Q1.21 + Q2.01 + Q3.01) divided by three.

Remarks:

This question and the following (Q3.01 – Q3.02) assess emotional wellbeing. Single-item assessments of emotional wellbeing are often used in large scale surveys (see Cooke, Melchert, & Connor, 2016 for an overview) and have been shown to perform quite well compared to multiple-items scales (e.g., Jovanović, 2016). We can therefore probably conclude that these single-item self-report measures are a sufficiently valid measure for the purpose of this paper.

#### Q3.02 Sadness

Question: Last month, did you feel sad?

Response Scale:

*strongly disagree, somewhat disagree, somewhat agree, strongly agree*

Used in Variable: sad\_3

Transformations:

Transformations: Transformed to numerical scale (ordinal): 1 Strongly Disagree 2 Somewhat Disagree 3 Somewhat Agree 4 Strongly Agree

Variable affect\_123, a measure of emotional wellbeing derived from items about happiness and sadness in all three questionnaires (Q1.21, Q1.22, Q2.01, Q2.02, Q3.01 and Q3.02) was calculated by subtracting the sum of all three sadness items (Q1.22 + Q2.02 + Q3.02) divided by three from the sum of all three happiness items (Q1.21 + Q2.01 + Q3.01) divided by three.

Remarks:

See above, under Q3.01

#### Q3.03 Stress

Question: Last month, did you feel stressed?

Response Scale:

*strongly disagree, somewhat disagree, somewhat agree, strongly agree*

Used in Variable: stress\_3

Transformations:

Variable Stressed\_123 was calculated by subtracting the sum of items Q1.24, Q2.04 and Q3.04 (Calmness) divided by 3 from the sum of items Q1.23, Q2.03 and Q3.03 (Stress) divided by 3.

Remarks:

See above, under Q3.01

### **Q3.04 Calmness**

Question: Last month, did you feel calm?

Response Scale:

*strongly disagree, somewhat disagree, somewhat agree, strongly agree*

Used in Variable: calm\_3

Transformations:

Variable Stressed\_123 was calculated by subtracting the sum of items Q1.24, Q2.04 and Q3.04 (Calmness) divided by 3 from the sum of items Q1.23, Q2.03 and Q3.03 (Stress) divided by 3.

Remarks:

See above, under Q3.01

### **Q3.05 Online Social Sharing**

Question: Did you share your scores on... Select all that apply

Response Scale:

*Your social media profile, Your website Twitter, A blog, A forum, A messaging service*

Used in Variable: share\_online\_23

online social sharing

Transformations: if participant selected one or more of these items OR if participant selected one or more of these items in questionnaire 2 (Q2.05), share\_online\_23 was set to 1; otherwise, share\_online\_23 was set to 0.

Remarks:

Single-item measurement of concrete, singular object

### **Q3.06 Offline Social Sharing**

Question: Whom did you tell about the My Santé Mobile programme? Select all that apply

Response Scale:

*A family member, A friend, A colleague, Members of a group (club, association, etc.)*

Used in variables: talked\_relative\_3, talked\_friends\_3, talked\_colleagues\_3, talked\_club\_3

Transformations: if participant selected 'a family member' here or in Q2 (Q2.06), talked\_relative\_23 was set to 1, otherwise 0

if participant selected 'a family member' here or in Q2 (Q2.06), talked\_friends\_23 was set to 1, otherwise 0

if participant selected 'a friend' here or in Q2 (Q2.06), talked\_club\_23 was set to 1, otherwise 0

if participant selected 'a colleague' here or in Q2 (Q2.06), talked\_colleagues\_23 was set to 1, otherwise 0

if participant selected 'members of a group' here or in Q2 (Q2.06), talked\_club\_23 was set to 1, otherwise 0

Remarks:

Single-item measurement of concrete, singular object

### **Q3.07 Neuroticism, negatively phrased**

Question: Here is a list of character traits that which may or may not describe you. Please indicate for each trait whether you think you possess this trait:

Anxious, Easily Troubled

Response Scale:

*7-point scale ranging from '1 - not at all agree' to '7 - totally agree'*

Used in variable: neurotic\_neg\_3

Transformations: The variable neurotic\_3 was calculated by subtracting the negatively phrased item on neuroticism (variable neurotic\_neg\_3, Q.3.07) from the positively phrased item on neuroticism (variable neurotic\_pos\_3, Q3.16).

Remarks:

These questions (Q3.07 – Q3.17) assess personality using Ten-Item Personality Inventory, which is generally considered a valid instrument to measure these constructs (Storme, Tavani, & Myszkowski, 2016).

### **Q3.08 Extraversion, negatively phrased**

Question: Here is a list of character traits that which may or may not describe you. Please indicate for each trait whether you think you possess this trait:

Reserved, Quiet

Response Scale:

*7-point scale ranging from '1 - not at all agree' to '7 - totally agree'*

Used in variable: extravert\_neg\_3

Transformations: The variable extravert\_3 was calculated by subtracting the negatively phrased item on extraversion (extravert\_neg\_3, Q.3.08) from the positively phrased item on extraversion (extravert\_pos\_3, Q3.09).

Remarks:

See above, under Q3.07

### **Q3.09 Extraversion, positively phrased**

Question: Here is a list of character traits that which may or may not describe you. Please indicate for each trait whether you think you possess this trait:

Extravert, Enthusiastic

Response Scale:

*7-point scale ranging from '1 - not at all agree' to '7 - totally agree'*

Used in variable: extravert\_pos\_3

Transformations: The variable `extravert_3` was calculated by subtracting the negatively phrased item on extraversion (`extravert_neg_3`, Q.3.08) from the positively phrased item on extraversion (`extravert_pos_3`, Q3.09).

Remarks:

See above under Q3.07.

### **Q3.10 Agreeableness, negatively phrased**

Question: Here is a list of character traits that which may or may not describe you. Please indicate for each trait whether you think you possess this trait:

Critical, aggressive

Response Scale:

*7-point scale ranging from '1 - not at all agree' to '7 - totally agree'*

Used in variable: `agreeable_neg_3`

Transformations: The variable `agreeable_3` was calculated by subtracting the negatively phrased item on extraversion (`agreeable_neg_3`, Q.3.10) from the positively phrased item on extraversion (`agreeable_pos_3`, Q3.14).

Remarks:

See above, under Q3.07

### **Q3.12 Conscientiousness, positively phrased**

Question: Here is a list of character traits that which may or may not describe you. Please indicate for each trait whether you think you possess this trait:

Conscientious, self-disciplined

Response Scale:

*7-point scale ranging from '1 - not at all agree' to '7 - totally agree'*

Used in variable: `consc_pos_3`

Transformations: The variable `consc_3` was calculated by subtracting the negatively phrased item on conscientiousness (`consc_neg_3`, Q.3.15) from the positively phrased item on conscientiousness (`consc_pos_3`, Q3.12).

Remarks:

See above, under Q3.07

### **Q3.13 Openness, positively phrased**

Question: Here is a list of character traits that which may or may not describe you. Please indicate for each trait whether you think you possess this trait:

Open to new experiences, curious

Response Scale:

*7-point scale ranging from '1 - not at all agree' to '7 - totally agree'*

Used in variable: `open_pos_3`

Transformations: The variable open\_3 was calculated by subtracting the negatively phrased item on conscientiousness (open\_neg\_3, Q.3.17) from the positively phrased item on extraversion (open\_pos\_3, Q3.13).

Remarks:

See above, under Q3.07

### **Q3.14 Agreeableness, positively phrased**

Question: Here is a list of character traits that which may or may not describe you. Please indicate for each trait whether you think you possess this trait:

Agreeable, warm

Response Scale:

*7-point scale ranging from '1 - not at all agree' to '7 - totally agree'*

Used in variable: agreeable\_pos\_3

Transformations: The variable agreeable\_3 was calculated by subtracting the negatively phrased item on extraversion (agreeable\_neg\_3, Q.3.10) from the positively phrased item on extraversion (agreeable\_pos\_3, Q3.14).

Remarks:

See above, under Q3.07

### **Q3.15 Conscientiousness, negatively phrased**

Question: Here is a list of character traits that which may or may not describe you. Please indicate for each trait whether you think you possess this trait:

Chaotic, prone to neglect

Response Scale:

*7-point scale ranging from '1 - not at all agree' to '7 - totally agree'*

Used in variable: consc\_neg\_3

Transformations: The variable consc\_3 was calculated by subtracting the negatively phrased item on conscientiousness (consc\_neg\_3, Q.3.15) from the positively phrased item on conscientiousness (consc\_pos\_3, Q3.12).

Remarks:

See above, under Q3.07

### **Q3.16 Neuroticism, positively phrased**

Question: Here is a list of character traits that which may or may not describe you. Please indicate for each trait whether you think you possess this trait:

Calm, Emotionally Stable

Response Scale:

*7-point scale ranging from '1 - not at all agree' to '7 - totally agree'*

Used in variable: neurotic\_pos\_3



Transformations: The variable neurotic\_3 was calculated by subtracting the negatively phrased item on neuroticism (variable neurotic\_neg\_3, Q.3.07) from the positively phrased item on neuroticism (variable neurotic\_pos\_3, Q3.16).

Remarks:

See above, under Q3.07

### **Q3.17 Openness, negatively phrased**

Question: Here is a list of character traits that which may or may not describe you. Please indicate for each trait whether you think you possess this trait:

Conservative, uncreative

Response Scale:

*7-point scale ranging from '1 - not at all agree' to '7 - totally agree'*

Used in variable: open\_neg\_3

Transformations: The variable open\_3 was calculated by subtracting the negatively phrased item on conscientiousness (open\_neg\_3, Q.3.17) from the positively phrased item on extraversion (open\_pos\_3, Q3.13).

Remarks:

See above, under Q3.07

### **Q3.18 Rebelliousness**

Question: Here is a list of character traits that which may or may not describe you. Please indicate for each trait whether you think you possess this trait:

Rebellious

Response Scale:

*7-point scale ranging from '1 - not at all agree' to '7 - totally agree'*

Used in variable: rebel\_3

Transformation: None

Remarks:

There is no literature on the validity of this item. However, we do not think this question has led to confusion in answering, therefore it is included in the analysis. We advise to treat the results of this item with caution.

### **Q3.19 Health-mindedness**

Question: Here is a list of character traits that which may or may not describe you. Please indicate for each trait whether you think you possess this trait:

Health-minded

Response Scale:

*7-point scale ranging from '1 - not at all agree' to '7 - totally agree'*

Used in variable: health\_minded\_3

Transformation: None

Remarks:

There is no literature on the validity of this item. However, we do not think this question has led to confusion in answering, therefore it is included in the analysis. We advise to treat the results of this item with caution.

### **Q3.20 Independence**

Question: Here is a list of character traits that which may or may not describe you. Please indicate for each trait whether you think you possess this trait:

Free, Independent

Response Scale:

*7-point scale ranging from '1 - not at all agree' to '7 - totally agree'*

Used in variable: independent\_3

Transformation: None

Remarks:

There is no literature on the validity of this item. However, we do not think this question has led to confusion in answering, therefore it is included in the analysis. We advise to treat the results of this item with caution.

### **Q3.21 Perceived Fitbit effect on physical activity**

Question: In your opinion, what effect has the Fitbit had on your daily habits? Do you think the Fitbit has helped you...

Increase your level of physical activity?

Response Scale:

*strongly disagree, somewhat disagree, somewhat agree, strongly agree*

Used in variable: help\_active\_3

Transformations: Transformed to numerical scale (ordinal): 1 Strongly Disagree 2 Somewhat Disagree 3 Somewhat Agree 4 Strongly Agree

Items Q3.21 – Q3.29 were used to calculate a weighted measure of perceived effect of the fitbit on the attainment of participants' goals.

perceived\_effect\_3 is a weighted mean of all answers to questions about the perceived effect of the fitbit in attaining a particular goal (such as getting in shape, losing weight, etcetera; Q3.21–Q3.29), calculated only for those goals that participants have. The perceived effect scores for those goals where participants scored either 3 (somewhat agree to have the goal) or 4 (strongly agree to have the goal) were added and divided by the total number of goals with scores of 3 or 4.

Remarks:

The effect of the Fitbit on fitness goals, like the previous items on the fitness goals themselves (Q1.25-Q1.33), were assessed using 9 items, each assessing a different goal: respondents were asked to indicate on a 4-pt Likert scale (1= strongly disagree, 4 =strongly agree) whether the Fitbit helped them realise their goal to improve sleep / quit smoking / observe nutrition / change nutrition / increase the motivation for physical activity / observe health / increase activity / lose weight. Each item was used as a single item measure of the self-reported effect on the specific goal that was assessed. Research has shown that single-item measures are valid when the attribute (in this case,

agreement) is concrete and singular and the object (in this case, the perceived effect of the Fitbit on the attainment of a fitness goal) is concrete (Bergqvist & Rossiter, 2007). Thus, we can probably conclude that these single-item self-report measures are a sufficiently valid measure for the purpose of this paper.

### **Q3.22 Perceived Fitbit effect on sleep quality**

Question: In your opinion, what effect has the Fitbit had on your daily habits? Do you think the Fitbit has helped you...

Increase the quality of your sleep?

Response Scale:

*strongly disagree, somewhat disagree, somewhat agree, strongly agree*

Used in variable: help\_sleep\_3

Transformations: Transformed to numerical scale (ordinal): 1 Strongly Disagree 2 Somewhat Disagree 3 Somewhat Agree 4 Strongly Agree

Items Q3.21 – Q3.29 were used to calculate a weighted measure of perceived effect of the fitbit on the attainment of participants' goals.

perceived\_effect\_3 is a weighted mean of all answers to questions about the perceived effect of the fitbit in attaining a particular goal (such as getting in shape, losing weight, etcetera; Q3.21–Q3.29), calculated only for those goals that participants have. The perceived effect scores for those goals where participants scored either 3 (somewhat agree to have the goal) or 4 (strongly agree to have the goal) were added and divided by the total number of goals with scores of 3 or 4.

Remarks: See above, under Q3.21

### **Q3.23 Perceived Fitbit effect on smoking**

Question: In your opinion, what effect has the Fitbit had on your daily habits? Do you think the Fitbit has helped you...

Quit smoking?

Response Scale:

*strongly disagree, somewhat disagree, somewhat agree, strongly agree*

Used in variable: help\_smoking\_3

Transformations: Transformed to numerical scale (ordinal): 1 Strongly Disagree 2 Somewhat Disagree 3 Somewhat Agree 4 Strongly Agree

Items Q3.21 – Q3.29 were used to calculate a weighted measure of perceived effect of the fitbit on the attainment of participants' goals.

perceived\_effect\_3 is a weighted mean of all answers to questions about the perceived effect of the fitbit in attaining a particular goal (such as getting in shape, losing weight, etcetera; Q3.21–Q3.29), calculated only for those goals that participants have. The perceived effect scores for those goals where participants scored either 3 (somewhat agree to have the goal) or 4 (strongly agree to have the goal) were added and divided by the total number of goals with scores of 3 or 4.

Remarks: See above, under Q3.21

### **Q3.24 Perceived Fitbit effect on monitoring diet**

Question: In your opinion, what effect has the Fitbit had on your daily habits? Do you think the Fitbit has helped you...

Monitor your diet?

Response Scale:

*strongly disagree, somewhat disagree, somewhat agree, strongly agree*

Used in variable: help\_monitor\_diet\_3

Transformations: Transformed to numerical scale (ordinal): 1 Strongly Disagree 2 Somewhat Disagree 3 Somewhat Agree 4 Strongly Agree

Items Q3.21 – Q3.29 were used to calculate a weighted measure of perceived effect of the fitbit on the attainment of participants' goals.

perceived\_effect\_3 is a weighted mean of all answers to questions about the perceived effect of the fitbit in attaining a particular goal (such as getting in shape, losing weight, etcetera; Q3.21–Q3.29), calculated only for those goals that participants have. The perceived effect scores for those goals where participants scored either 3 (somewhat agree to have the goal) or 4 (strongly agree to have the goal) were added and divided by the total number of goals with scores of 3 or 4.

Remarks: See above, under Q3.21

### **Q3.25 Perceived Fitbit effect on eating habits**

Question: In your opinion, what effect has the Fitbit had on your daily habits? Do you think the Fitbit has helped you...

Change your eating habits?

Response Scale:

*strongly disagree, somewhat disagree, somewhat agree, strongly agree*

Used in variable: help\_eating\_habits\_3

Transformations: Transformed to numerical scale (ordinal): 1 Strongly Disagree 2 Somewhat Disagree 3 Somewhat Agree 4 Strongly Agree

Items Q3.21 – Q3.29 were used to calculate a weighted measure of perceived effect of the fitbit on the attainment of participants' goals.

perceived\_effect\_3 is a weighted mean of all answers to questions about the perceived effect of the fitbit in attaining a particular goal (such as getting in shape, losing weight, etcetera; Q3.21–Q3.29), calculated only for those goals that participants have. The perceived effect scores for those goals where participants scored either 3 (somewhat agree to have the goal) or 4 (strongly agree to have the goal) were added and divided by the total number of goals with scores of 3 or 4.

Remarks: See above, under Q3.21

### **Q3.26 Perceived Fitbit effect on motivation**

Question: In your opinion, what effect has the Fitbit had on your daily habits? Do you think the Fitbit has helped you...

Maintain your motivation for physical activity?

Response Scale:

*strongly disagree, somewhat disagree, somewhat agree, strongly agree*

Used in variable: help\_motivation\_3

Transformations: Transformed to numerical scale (ordinal): 1 Strongly Disagree 2 Somewhat Disagree 3 Somewhat Agree 4 Strongly Agree

Items Q3.21 – Q3.29 were used to calculate a weighted measure of perceived effect of the fitbit on the attainment of participants' goals.

perceived\_effect\_3 is a weighted mean of all answers to questions about the perceived effect of the fitbit in attaining a particular goal (such as getting in shape, losing weight, etcetera; Q3.21–Q3.29), calculated only for those goals that participants have. The perceived effect scores for those goals where participants scored either 3 (somewhat agree to have the goal) or 4 (strongly agree to have the goal) were added and divided by the total number of goals with scores of 3 or 4.

Remarks: See above, under Q3.21

### **Q3.27 Perceived Fitbit effect on health**

Question: In your opinion, what effect has the Fitbit had on your daily habits? Do you think the Fitbit has helped you...

Keep your health in check?

Response Scale:

*strongly disagree, somewhat disagree, somewhat agree, strongly agree*

Used in variable: help\_health\_3

Transformations: Transformed to numerical scale (ordinal): 1 Strongly Disagree 2 Somewhat Disagree 3 Somewhat Agree 4 Strongly Agree

Items Q3.21 – Q3.29 were used to calculate a weighted measure of perceived effect of the fitbit on the attainment of participants' goals.

perceived\_effect\_3 is a weighted mean of all answers to questions about the perceived effect of the fitbit in attaining a particular goal (such as getting in shape, losing weight, etcetera; Q3.21–Q3.29), calculated only for those goals that participants have. The perceived effect scores for those goals where participants scored either 3 (somewhat agree to have the goal) or 4 (strongly agree to have the goal) were added and divided by the total number of goals with scores of 3 or 4.

Remarks: See above, under Q3.21

### **Q3.28 Perceived Fitbit effect on weight loss**

Question: In your opinion, what effect has the Fitbit had on your daily habits? Do you think the Fitbit has helped you...

Lose weight?

Response Scale:

*strongly disagree, somewhat disagree, somewhat agree, strongly agree*

Used in variable: help\_weight\_3

Transformations: Transformed to numerical scale (ordinal): 1 Strongly Disagree 2 Somewhat Disagree 3 Somewhat Agree 4 Strongly Agree

Items Q3.21 – Q3.29 were used to calculate a weighted measure of perceived effect of the fitbit on the attainment of participants' goals.

perceived\_effect\_3 is a weighted mean of all answers to questions about the perceived effect of the fitbit in attaining a particular goal (such as getting in shape, losing weight, etcetera; Q3.21–Q3.29), calculated only for those goals that participants have. The perceived effect scores for those goals

where participants scored either 3 (somewhat agree to have the goal) or 4 (strongly agree to have the goal) were added and divided by the total number of goals with scores of 3 or 4.

Remarks: See above, under Q3.21

### **Q3.29 Perceived Fitbit effect on physical shape**

Question: In your opinion, what effect has the Fitbit had on your daily habits? Do you think the Fitbit has helped you...

Improve your physical shape?

Response Scale:

*strongly disagree, somewhat disagree, somewhat agree, strongly agree*

Used in variable: help\_shape\_3

Transformations: Transformed to numerical scale (ordinal): 1 Strongly Disagree 2 Somewhat Disagree 3 Somewhat Agree 4 Strongly Agree

Items Q3.21 – Q3.29 were used to calculate a weighted measure of perceived effect of the fitbit on the attainment of participants' goals.

perceived\_effect\_3 is a weighted mean of all answers to questions about the perceived effect of the fitbit in attaining a particular goal (such as getting in shape, losing weight, etcetera; Q3.21–Q3.29), calculated only for those goals that participants have. The perceived effect scores for those goals where participants scored either 3 (somewhat agree to have the goal) or 4 (strongly agree to have the goal) were added and divided by the total number of goals with scores of 3 or 4.

### **Q3.30 Digital Proficiency**

Question: How would you rate your level of usage of the new technologies? Would you call yourself mostly:

Beginner, Regular User, Technophile / Geek

Response scale:

*Beginner, Regular User, Technophile / Geek*

Used in variable: tech\_level\_3

Transformations: Transformed to numerical scale (ordinal): 1 Beginner, 2 Regular user, 3 Technophile / Geek

Remarks:

The question is formulated rather broadly. The categories are also rather vague ('novice' or 'regular' in what?) or emotionally loaded ('technophile / geek'). However, the item may still be usable if the respondents grasped the intention behind the question. As a result, this item might measure something of the 'technological proficiency' of the user (in using the internet, apps, gadgets).

A more valid measure of 'Internet skills' can be found in Deursen, Dijk and Peters (2011). Internet skills are not equivalent to 'technological proficiency', but the 'medium related' factor in this

measure should probably correlate with one considers to be 'technological proficiency' in this internet age.

We advise to treat the results of this item with caution.

### **Q3.31 Exactness**

Question: Here is a list of characteristics that you could attribute to the Fitbit. Please indicate whether you think the Fitbit...

Delivers exact information

Response Scale:

*7-point scale ranging from '1 - not at all agree' to '7 - totally agree'*

Used in variable: eval\_exact\_3

Transformations: Scores on items Q2.07 – Q2.18 from Questionnaire 2, and items Q3.23 – Q3.40 from Questionnaire 3 were used in a factor analysis, which informed the construction of three scales:

1) Valence (UX\_valence), formed by the sum of the items usefulness / practicality (Q2.07), enjoyableness (Q2.08), modernity (Q2.10), fun (Q2.11), credibility (Q3.34), ease of use (Q2.13), level of answering to needs (Q2.15), beauty (Q2.18), and robustness (Q2.19), divided by 9, minus the sum of the items intrusiveness (Q2.09), inconvenience (Q2.14, and cumbersomeness / nuisance (Q2.16), divided by 3.

2) Preciseness (UX\_precise), formed by the sum of the items exactness (Q3.31), level of detail (Q3.32), clarity (Q3.33), and reliability (Q2.12), divided by 4, and

3) perceived efficacy (UX\_effect), formed by the sum of the items perceived effect on activity increase (Q3.37), perceived effect on health changes (Q3.38), and wellbeing (Q3.39), divided by three.

The results of the factor analysis (PCA) can be found in table 1 (items Q2.07 – Q2.18) and 2 (items Q3.23 – Q3.40) at the end of this multimedia appendix.

Remarks:

The three UX-related factors Valence, Preciseness, and Perceived Efficacy match similar factors in user experience research (e.g. Hassenzahl, 2003). Therefore we may conclude that the results of the factor analysis are valid enough for the purpose of this study.

### **Q3.32 Detail**

Question: Here is a list of characteristics that you could attribute to the Fitbit. Please indicate whether you think the Fitbit...

Delivers detailed information

Response Scale:

*7-point scale ranging from '1 - not at all agree' to '7 - totally agree'*

Used in variable: eval\_detailed\_3

Transformations: See above, under Q3.31

Remarks:

See above, under Q3.31

### **Q3.33 Clarity**

Question: Here is a list of characteristics that you could attribute to the Fitbit. Please indicate whether you think the Fitbit...

Delivers clear information

Response Scale:

*7-point scale ranging from '1 - not at all agree' to '7 - totally agree'*

Used in variable: eval\_clear\_3

Transformations: See above, under Q3.31

Remarks:

See above, under Q3.31

### **Q3.34 Credibility**

Question: Here is a list of characteristics that you could attribute to the Fitbit. Please indicate whether you think the Fitbit...

Delivers credible information

Response Scale:

*7-point scale ranging from '1 - not at all agree' to '7 - totally agree'*

Used in variable: eval\_credible\_3

Transformations: See above, under Q3.31

Remarks:

See above, under Q3.31

### **Q3.35 Confidence for behavioural decisions**

Question: Here is a list of characteristics that you could attribute to the Fitbit. Please indicate whether you think the Fitbit...

Delivers information upon which you can base decisions for healthy behaviour

Response Scale:

*7-point scale ranging from '1 - not at all agree' to '7 - totally agree'*

Used in variable: eval\_useful\_3

Transformations: See above, under Q3.31

Remarks:

See above, under Q3.31

### **Q3.36 Insight in activity**

Question: Here is a list of characteristics that you could attribute to the Fitbit. Please indicate whether you think the Fitbit...

Gives insight in your real physical activity

Response Scale:



*7-point scale ranging from '1 - not at all agree' to '7 - totally agree'*

Used in variable: eval\_aware\_3

Transformations: See above, under Q3.31

Remarks:

See above, under Q3.31

### **Q3.37 Enabling increased physical activity**

Question: Here is a list of characteristics that you could attribute to the Fitbit. Please indicate whether you think the Fitbit...

Enables you to increase your physical activity

Response Scale:

*7-point scale ranging from '1 - not at all agree' to '7 - totally agree'*

Used in variable: eval\_enables\_activity\_3

Transformations: See above, under Q3.31

Remarks:

See above, under Q3.31

### **Q3.38 Enabling improved health**

Question: Here is a list of characteristics that you could attribute to the Fitbit. Please indicate whether you think the Fitbit...

Enables you to improve your health

Response Scale:

*7-point scale ranging from '1 - not at all agree' to '7 - totally agree'*

Used in variable: eval\_enables\_health\_3

Transformations: See above, under Q3.31

Remarks:

See above, under Q3.31

### **Q3.39 Enabling improved wellbeing**

Question: Here is a list of characteristics that you could attribute to the Fitbit. Please indicate whether you think the Fitbit...

Has improved your wellbeing

Response Scale:

*7-point scale ranging from '1 - not at all agree' to '7 - totally agree'*

Used in variable: eval\_wellbeing\_3

Transformations: See above, under Q3.31

Remarks:

See above, under Q3.31

### **Q3.40 Enabling new monitoring habits**

Question: Here is a list of characteristics that you could attribute to the Fitbit. Please indicate whether you think the Fitbit...

Has enabled you to develop a habit of checking your stats

Response Scale:

*7-point scale ranging from '1 - not at all agree' to '7 - totally agree'*

Used in variable: eval\_monitor\_3

Transformations: See above, under Q3.31

Remarks:

See above, under Q3.31

## Literature

- Buysse, D. J., Reynolds, C. F., Monk, T. H., Berman, S. R., & Kupfer, D. J. (1989). The Pittsburgh Sleep Quality Index: a new instrument for psychiatric practice and research. *Psychiatry research*, *28*(2), 193-213.
- Cappelleri, J. C., Bushmakin, A. G., McDermott, A. M., Sadosky, A. B., Petrie, C. D., & Martin, S. (2009). Psychometric properties of a single-item scale to assess sleep quality among individuals with fibromyalgia. *Health and Quality of Life Outcomes*, *7*(1), 54.
- Cooke, P. J., Melchert, T. P., & Connor, K. (2016). Measuring well-being: A review of instruments. *The Counseling Psychologist*, *44*(5), 730-757.
- Geurden, B., Wouters, C., Franck, E., Weyler, J., & Ysebaert, D. (2014). Does Documentation in Nursing Records of Nutritional Screening on Admission to Hospital Reflect the Use of Evidence-Based Practice Guidelines for Malnutrition?. *International journal of nursing knowledge*, *25*(1), 43-48.
- Gorber, S. C., Schofield-Hurwitz, S., Hardt, J., Levasseur, G., & Tremblay, M. (2009). The accuracy of self-reported smoking: a systematic review of the relationship between self-reported and cotinine-assessed smoking status. *Nicotine & Tobacco Research*, *11*(1), 12-24.
- Hassenzahl, M. (2003). The Thing and I: Understanding the Relationship Between User and Product. In: Blythe, M.A. (Ed.) *Funology*. Boston [etc.]: Kluwer Academic Publishers, 31–42.
- Jenkins, C. D., Stanton, B. A., Niemcryk, S. J., & Rose, R. M. (1988). A scale for the estimation of sleep problems in clinical research. *Journal of clinical epidemiology*, *41*(4), 313-321.
- Jovanović, V. (2016). The validity of the Satisfaction with Life Scale in adolescents and a comparison with single-item life satisfaction measures: a preliminary study. *Quality of Life Research*, *25*(12), 3173-3180.
- Kelly, C., Fitzgerald, A., Sentenac, M., Gakewski, J., Molcho, M., & Gabhainn, S. N. (2016). Weight concerns among adolescent boys. *Public health nutrition*, *19*(03), 456-462.
- Klesges, R. C., Debon, M., & Ray, J. W. (1995). Are self-reports of smoking rate biased? Evidence from the Second National Health and Nutrition Examination Survey. *Journal of clinical epidemiology*, *48*(10), 1225-1233.
- Li, K., Haynie, D., Palla, H., Lipsky, L., Iannotti, R. J., & Simons-Morton, B. (2016). Assessment of adolescent weight status: Similarities and differences between CDC, IOTF, and WHO references. *Preventive medicine*, *87*, 151-154.
- Ministère de l'Enseignement Supérieur, de la Recherche et de l'Innovation MESRI (2017). French classification of levels of educational attainment defined by the French statistical commission on vocational training and social advancement. Retrieved on 19/06/2017 from [https://publication.enseignementsup-recherche.gouv.fr/eesr/8EN/EESR8EN\\_Appendix\\_6-levels\\_of\\_educational\\_attainment.php](https://publication.enseignementsup-recherche.gouv.fr/eesr/8EN/EESR8EN_Appendix_6-levels_of_educational_attainment.php). Archived by Webcite at <http://www.webcitation.org/6rKvsnc0t>.
- Niedhammer, I., Chastang, J. F., David, S., & Kelleher, C. (2008). The contribution of occupational factors to social inequalities in health: findings from the national French SUMER survey. *Social science & medicine*, *67*(11), 1870-1881.

Patel, A., Rendu, A., Moran, P., Leese, M., Mann, A., & Knapp, M. (2005). A comparison of two methods of collecting economic data in primary care. *Family Practice*, 22(3), 323-327.

Patrick, D. L., Cheadle, A., Thompson, D. C., Diehr, P., Koepsell, T., & Kinne, S. (1994). The validity of self-reported smoking: a review and meta-analysis. *American journal of public health*, 84(7), 1086-1093.

Sallis, J. F., & Saelens, B. E. (2000). Assessment of physical activity by self-report: status, limitations, and future directions. *Research quarterly for exercise and sport*, 71(sup2), 1-14.

Spencer, E. A., Appleby, P. N., Davey, G. K., & Key, T. J. (2002). Validity of self-reported height and weight in 4808 EPIC-Oxford participants. *Public health nutrition*, 5(04), 561-565.

Storme, M., Tavani, J. L., & Myszkowski, N. (2016). Psychometric properties of the French ten-item personality inventory (TIPI). *Journal of Individual Differences*.

Subar, A. F., Freedman, L. S., Tooze, J. A., Kirkpatrick, S. I., Boushey, C., Neuhauser, M. L., ... & Reedy, J. (2015). Addressing current criticism regarding the value of self-report dietary data. *The Journal of nutrition*, 145(12), 2639-2645.
